# Supplementary material for: Hispidulin Alleviates Mast Cell-Mediated Allergic Airway Inflammation through FcεR1 and Nrf2/HO-1 Signaling Pathway
Source: MDPI journal article supplement (doi:10.3390/antiox13050528), 2024-04-26
Supplement: s1 [file s1]

## Supporting information

# Hispidulin alleviates mast cell-mediated allergic airway inflammation through FcεR1 and Nrf2/HO-1 signaling pathway

*Seungwon Jeong*<sup>1,2</sup>, *Yeon-Yong Kim*<sup>1</sup>, *Dongwon Lee*<sup>2,3</sup>, *Sang-Hyun Kim*<sup>4,\*</sup>, *Soyoung Lee*<sup>1,\*</sup>

<sup>1</sup> Functional Biomaterial Research Center, Korea Research Institute of Bioscience and Biotechnology (KRIBB), 181, Ipsin-gil, Jeongseup 56212, Republic of Korea

<sup>2</sup> Department of Bionanotechnology and Bioconvergence Engineering, Jeonbuk National University, 567, Baekje-daero, Jeonju 54896, Jeonbuk, Republic of Korea

<sup>3</sup> Department of Polymer Nano Science and Technology, Jeonbuk National University, 567, Baekje-daero, Jeonju 54896, Jeonbuk, Republic of Korea

<sup>4</sup> CMRI, Department of Pharmacology, School of Medicine, Kyungpook National University, Daegu 41944, Republic of Korea

**Table S1.** The primer sequences for the qPCR

| RAT primer   |                    |        |                                   |                                   |
|--------------|--------------------|--------|-----------------------------------|-----------------------------------|
| No.          | Name               | Source | Forward(Sense)                    | Reverse(Antisense)                |
| 1            | Rat IL-4           | RAT    | ACC TTG CTG TCA CCC TGT TC        | TTG TGA GCG TGG ACT CAT TC        |
| 2            | Rat IL-6           | RAT    | TGT GCA ATG GCA ATT CTG AT        | GAG CAT TGG AAG TTG GGG TA        |
| 3            | Rat IL-13          | RAT    | CCA CAG GAC CCA GAG GAT ATT GA    | TAG CGG AAA AGT TGC TTG GAG TAA   |
| 4            | Rat TNF- $\alpha$  | RAT    | TCC CAA ATG GGC TCC CTC TC        | AAA TGG CAA ACC GGC TGA CG        |
| 5            | Rat SOD2           | RAT    | AGC TGC ACC ACA GCA AGC AC        | TCC ACC ACC CTT AGG GCT CA        |
| 6            | Rat CAT            | RAT    | TCC GGG ATC TTT TTA ACG CCA TTG   | TCG AGC ACG GTA GGG ACA GTT CAC   |
| 7            | Rat GPx            | RAT    | CGG TTT CCC GTG CAA TCA GT        | ACA CCG GGG ACC AAA TGA TG        |
| 8            | Rat $\beta$ -actin | RAT    | GAA GCT GTG CTA TGT TGC CCT AGA   | GTA CTC CTG CTT GCT GAT CCA CAT   |
| Mouse primer |                    |        |                                   |                                   |
| No.          | Name               | Source | Forward(Sense)                    | Reverse(Antisense)                |
| 1            | M IL-1 $\beta$     | Mouse  | GGC CGA CTT CAC TGT ACA AC        | CCT TCA CAG AGA GGG TCA CAG       |
| 2            | M IL-4             | Mouse  | TCT CGA ATG TAC CAG GAG CCA TAT C | AGC ACC TTG GAA GCC CTA CAG A     |
| 3            | M IL-5             | Mouse  | ATG GAG ATT CCC ATG AGC AC        | AGC CCC TGA AAG ATT TCT CC        |
| 4            | M IL-6             | Mouse  | CCA CTT CAC AAG TCG GAG GCT TA    | GCA AGT GCA TCA TCG TTG TTC ATA C |
| 5            | M IL-10            | Mouse  | TGG CCC AGA AAT CAA GGA GC        | CAG CAG ACT CAA TAC ACA CT        |
| 6            | M IL-13            | Mouse  | CCT CTG ACC CTT AAG GAG CTT       | ATG TTG GTC AGG GAA TCC AG        |
| 7            | M TNF- $\alpha$    | Mouse  | AAG CCT GTA GCC CAC GTC GTA       | GGC ACC ACT AGT TGG TTG TCT TTG   |
| 8            | M CCL2             | Mouse  | CAG CAG GTG TCC CAA AGA A         | CTT GAG GTG GTT GTG GAA AA        |
| 9            | M CCL3             | Mouse  | TCT GCA ACC AAG TCT TCT CAG       | GAA GAG TCC CTC GAT GTG GAT A     |
| 10           | M CXCL8            | Mouse  | CCA CCT TGA GGC AAG ATC CC        | CCC AGA ATC AAC GCA AAG CC        |
| 11           | M Tpsg1            | Mouse  | GGT CAC ACT GTC TCC CCA CT        | GCA TCC CAG GGT AGA AGT CA        |
| 12           | M c-Kit            | Mouse  | AGC AAT GGC CTC ACG AGT TCT A     | CCA GGA AAA GTT TGG CAG GAT       |
| 13           | M $\beta$ -Actin   | Mouse  | TAG ACT TCG AGC AGG AGA TG        | TTG ATC TTC ATG GTG CTA GG        |

**Table S2.** The list of antibodies

| <b>Antibody</b>                           |                   |       |          |          |
|-------------------------------------------|-------------------|-------|----------|----------|
| Protein                                   | Type of antibody  | Cat.  | Dilution | Supplier |
| Phospho-Akt (Ser473)                      | Rabbit polyclonal | 9271  | 1/1000   | CST      |
| Phospho-IKK $\alpha$ $\beta$ (Ser176/180) | Rabbit monoclonal | 2697  | 1/1000   | CST      |
| Phospho-Lyn (Tyr507)                      | Rabbit polyclonal | 2731  | 1/1000   | CST      |
| Phospho-PI3K p85                          | Rabbit polyclonal | 4228  | 1/1000   | CST      |
| Phospho-PLC- $\gamma$ (Tyr783)            | Rabbit monoclonal | 2821  | 1/1000   | CST      |
|                                           |                   |       |          |          |
| $\beta$ -Actin                            | Rabbit monoclonal | 4967  | 1/1000   | CST      |
| Akt                                       | Rabbit polyclonal | 9272  | 1/1000   | CST      |
| HO-1                                      | Rabbit monoclonal | 5853  | 1/1000   | CST      |
| I $\kappa$ B $\alpha$                     | Rabbit monoclonal | 4812  | 1/1000   | CST      |
| Lamin B1                                  | Rabbit monoclonal | 12586 | 1/1000   | CST      |
| Lyn                                       | Rabbit polyclonal | 2732  | 1/1000   | CST      |
| Nrf2                                      | Rabbit monoclonal | 12721 | 1/1000   | CST      |
| PI3K p85                                  | Rabbit polyclonal | 4292  | 1/1000   | CST      |
| PLC- $\gamma$                             | Rabbit monoclonal | 2822  | 1/1000   | CST      |

**Figure S1.** OVA-induced allergic asthma model

❖ **OVA-induced asthma model**

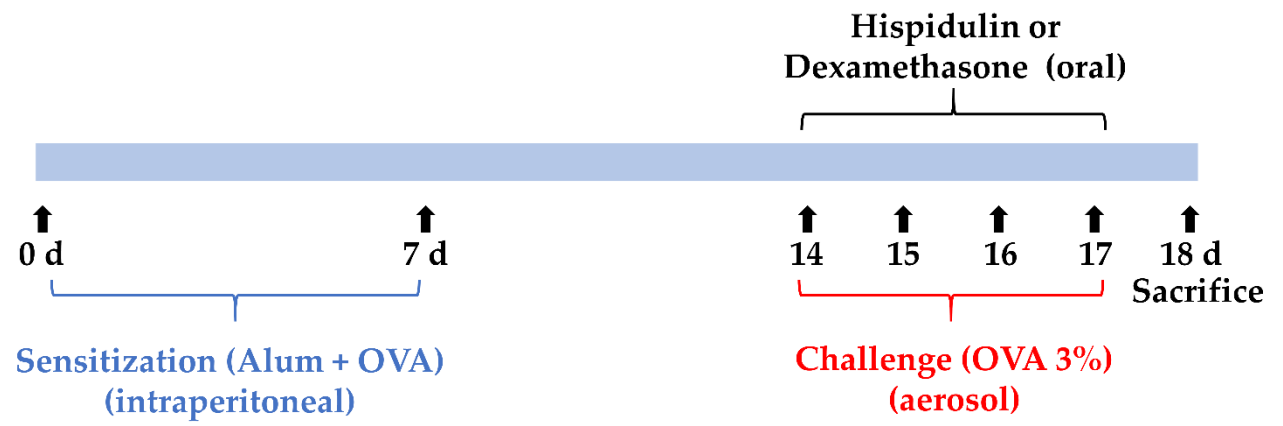

**Figure S2. LPS-induced acute lung injury model**

**❖ LPS-induced acute lung injury model**

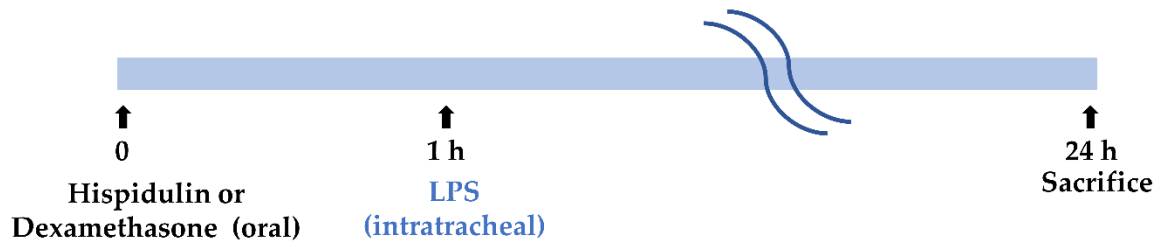

**Figure S3.** Effects of HPD on continuous calcium measurements

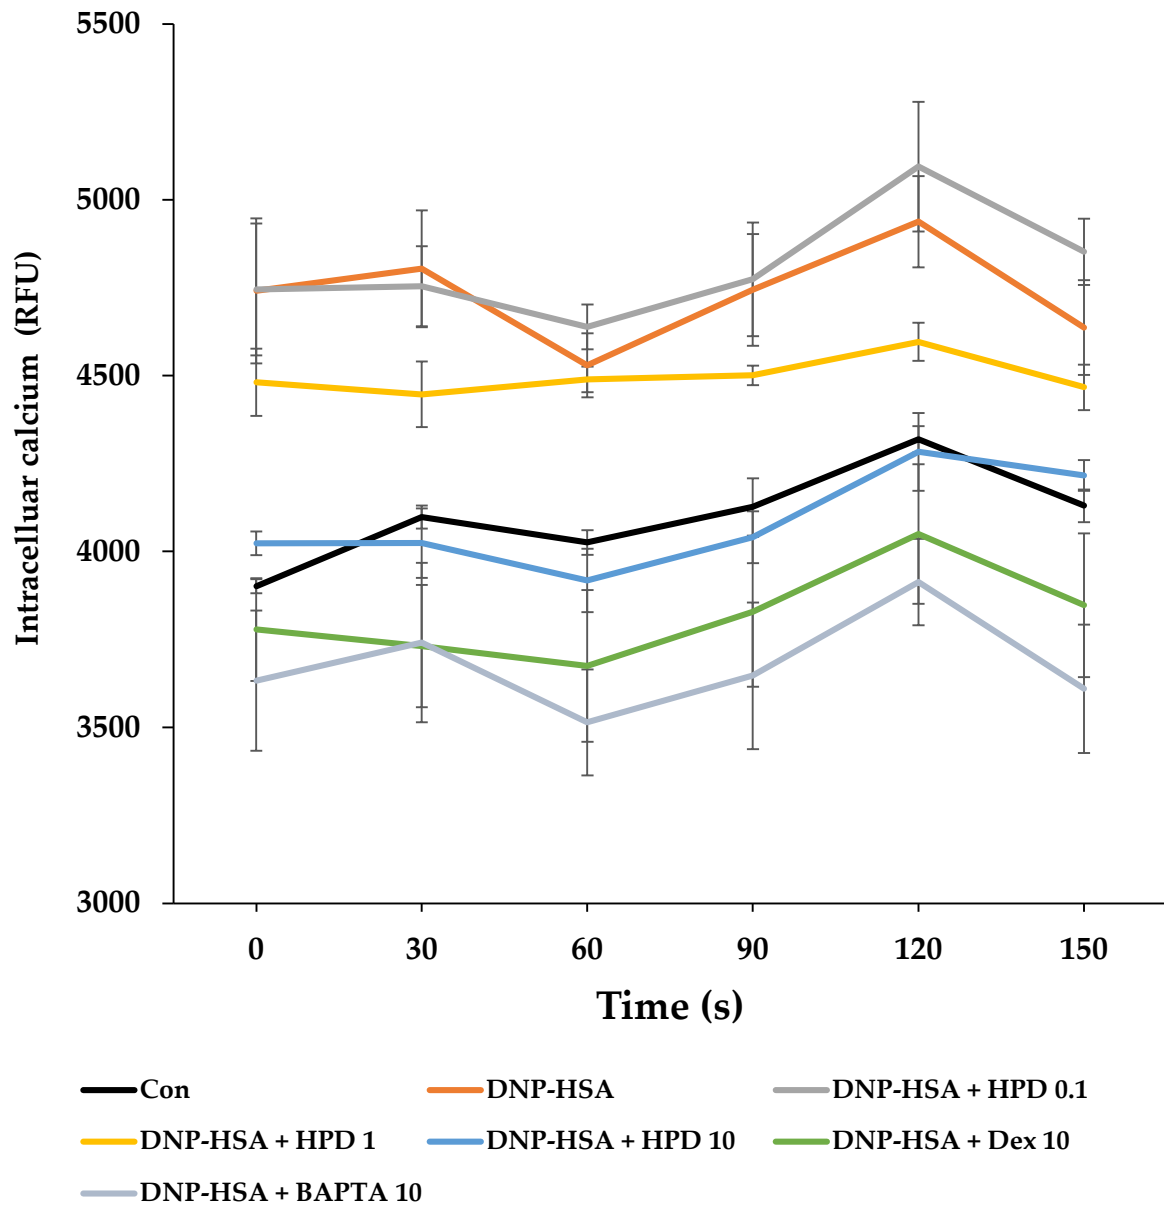

The intracellular calcium level was kinetically measured for total 150 s, every 30 s, 5 times. Values are mean  $\pm$  SEM (n=5). \* $p < 0.05$  relative to DNP-HSA group.

**Figure S4.** Effects of HPD on cellular infiltration into BALF

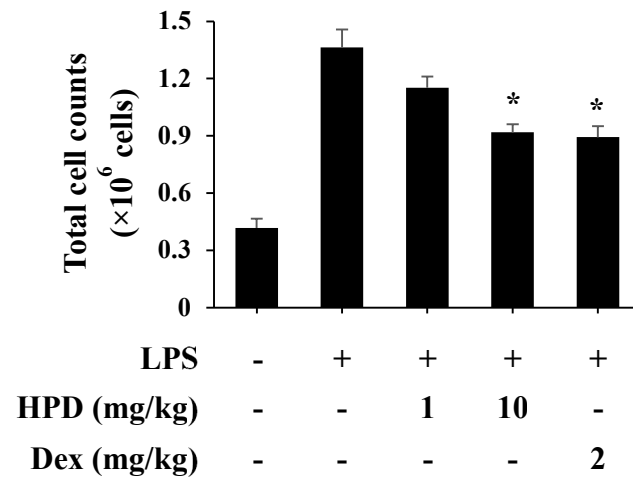

The variation of total cell counts in BALF of LPS-induced ALI model. Values are mean  $\pm$  SEM (n=5). \* $p < 0.05$  relative to LPS group.
